# Supplementary material
Source: PubMed Central journal article supplement (PMC1149439)

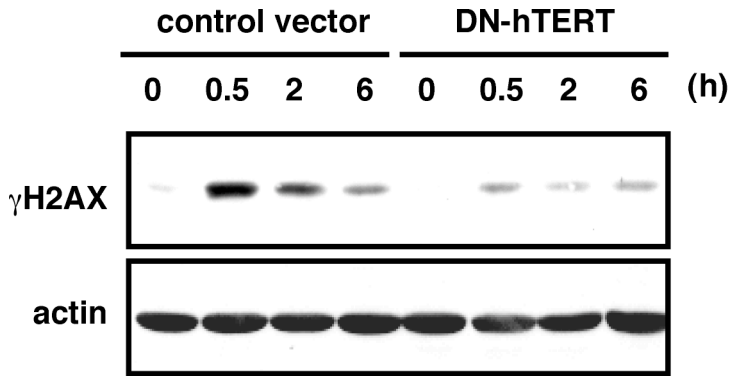

Supplement: pnas_0503095102_2.pdf [file pnas_0503095102_2.pdf]
